# Supplementary material
Source: PubMed Central journal article supplement (PMC7610679)
Supplement: EMS110302-supplement-Supplementary_Material.pdf [file EMS110302-supplement-Supplementary_Material.pdf]

**Supplementary Materials**

| <b>Ipsilesional Data (ARAT)</b> |                 |         | <b>Contralesional Data (FM-UE)</b> |                |         |
|---------------------------------|-----------------|---------|------------------------------------|----------------|---------|
| Session                         | Mean $\pm$ SD   | Range   | Session                            | Mean $\pm$ SD  | Range   |
| 1                               | 48.0 $\pm$ 14.0 | 8 – 57  | 1                                  | 61.8 $\pm$ 2.9 | 56 – 66 |
| 2                               | 53.4 $\pm$ 8.0  | 23 – 57 | 2                                  | 62.5 $\pm$ 2.8 | 56 – 66 |
| 3                               | 54.5 $\pm$ 6.1  | 31 – 57 | 3                                  | 63.1 $\pm$ 2.8 | 56 – 66 |
| 4                               | 55.2 $\pm$ 5.2  | 39 – 57 | 4                                  | 63.9 $\pm$ 2.2 | 58 – 66 |
| 5                               | 56.3 $\pm$ 2.5  | 46 – 57 |                                    |                |         |
| 6                               | 56.4 $\pm$ 2.4  | 45 – 57 |                                    |                |         |
| 7                               | 56.2 $\pm$ 2.8  | 42 – 57 |                                    |                |         |
| 8                               | 56.5 $\pm$ 1.6  | 51 – 57 |                                    |                |         |

**Table 1: ARAT and FM-UE scores across the data collection period**

ARAT, action research arm test; FM-UE, Fugl Meyer upper extremity.

| Ipsilesional Data |                 |                   | Contralesional Data |                |                   |
|-------------------|-----------------|-------------------|---------------------|----------------|-------------------|
| Session           | RMT (% MSO)     | Baseline MEP (mV) | Session             | RMT (% MSO)    | Baseline MEP (mV) |
|                   | mean $\pm$ SD   | mean $\pm$ SD     |                     | mean $\pm$ SD  | mean $\pm$ SD     |
| 1                 | 50.5 $\pm$ 14.2 | 0.99 $\pm$ 0.76   | 1                   | 45.6 $\pm$ 8.3 | 0.92 $\pm$ 0.45   |
| 2                 | 52.4 $\pm$ 13.1 | 0.87 $\pm$ 0.63   | 2                   | 45.3 $\pm$ 6.8 | 0.90 $\pm$ 0.41   |
| 3                 | 51.4 $\pm$ 12.8 | 0.70 $\pm$ 0.72   | 3                   | 45.8 $\pm$ 7.8 | 0.87 $\pm$ 0.47   |
| 4                 | 52.4 $\pm$ 12.9 | 0.69 $\pm$ 0.65   | 4                   | 45.4 $\pm$ 8.9 | 0.97 $\pm$ 0.37   |
| 5                 | 50.5 $\pm$ 13.1 | 0.75 $\pm$ 0.61   |                     |                |                   |
| 6                 | 51.2 $\pm$ 11.6 | 0.66 $\pm$ 0.64   |                     |                |                   |
| 7                 | 50.8 $\pm$ 10.7 | 0.67 $\pm$ 0.64   |                     |                |                   |
| 8                 | 51.3 $\pm$ 11.1 | 0.59 $\pm$ 0.48   |                     |                |                   |

**Table 2: Resting motor threshold and baseline motor evoked potential amplitude for each session.**

MEP, motor evoked potential; MSO, maximal stimulator output; mV, millivolt; RMT, resting motor threshold.

| <b>Model Parameter</b>            | <b>Beta Estimate</b> | <b>Standard Error</b> | <b>Confidence Interval</b> | <b>p-value</b> |
|-----------------------------------|----------------------|-----------------------|----------------------------|----------------|
| <b><i>Ipsilesional Data</i></b>   |                      |                       |                            |                |
| Intercept                         | 52.057               | 2.163                 | 47.673 to 56.441           | <2e-16*        |
| Session                           | -0.140               | 0.146                 | -0.428 to 0.148            | 0.336          |
| <b><i>Contralesional Data</i></b> |                      |                       |                            |                |
| Intercept                         | 45.561               | 1.801                 | 41.682 to 49.260           | <2e-16*        |
| Session                           | -0.012               | 0.544                 | -1.139 to 1.115            | 0.982          |

**Table 3: Fixed effects of resting motor threshold in the ipsilesional hemisphere (top) and contralesional hemisphere (bottom)**

\* indicates statistically significant at  $p \leq 0.05$

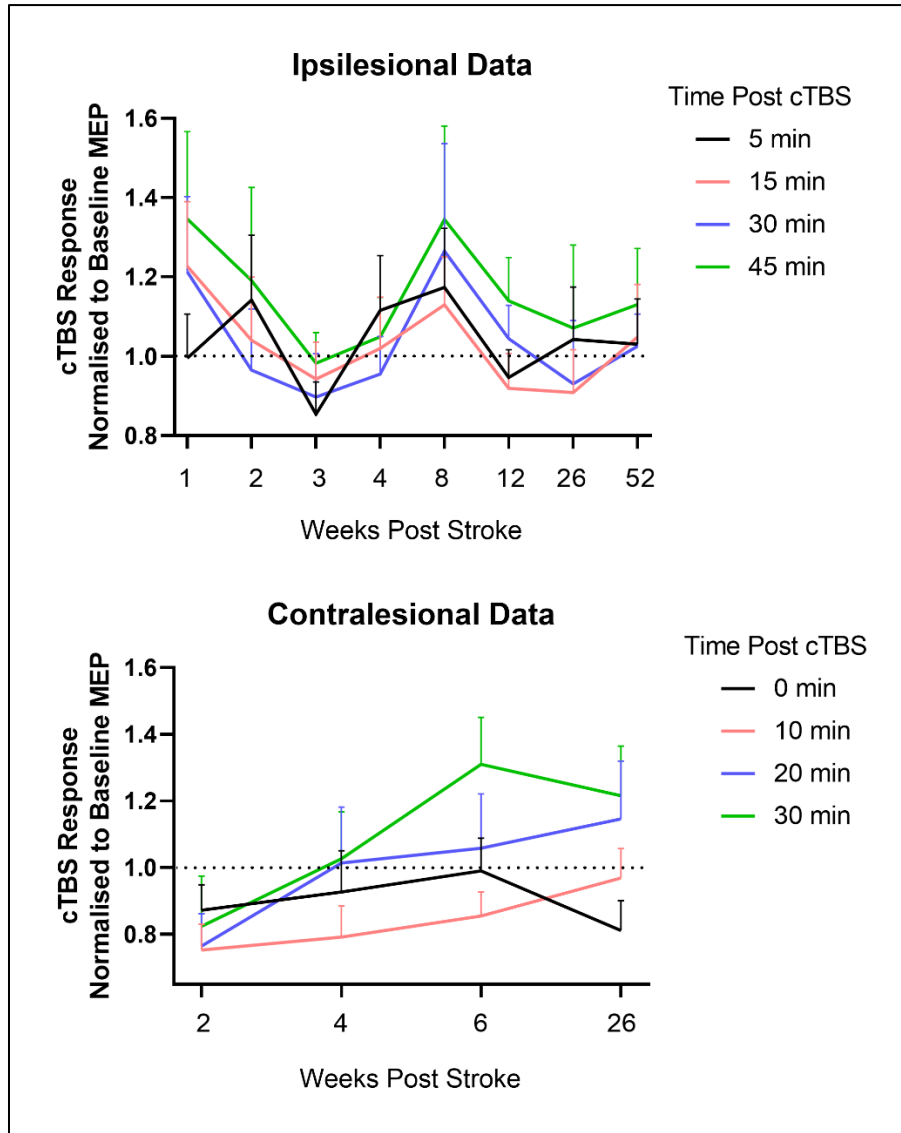

**Figure 1: Continuous theta burst stimulation response for the ipsilesional hemisphere (top) and contralesional hemisphere (bottom).** Amplitudes of motor evoked potentials have been normalised to baseline. Error bars are standard deviation.

Note, continuous theta burst stimulation is thought to induce a suppression of cortical excitability. Therefore, a larger decrease in motor evoked potential amplitude indicates greater plasticity. Data points below the dashed black line indicate motor evoked potential suppression. cTBS, continuous theta burst stimulation; MEP, motor evoked potential.

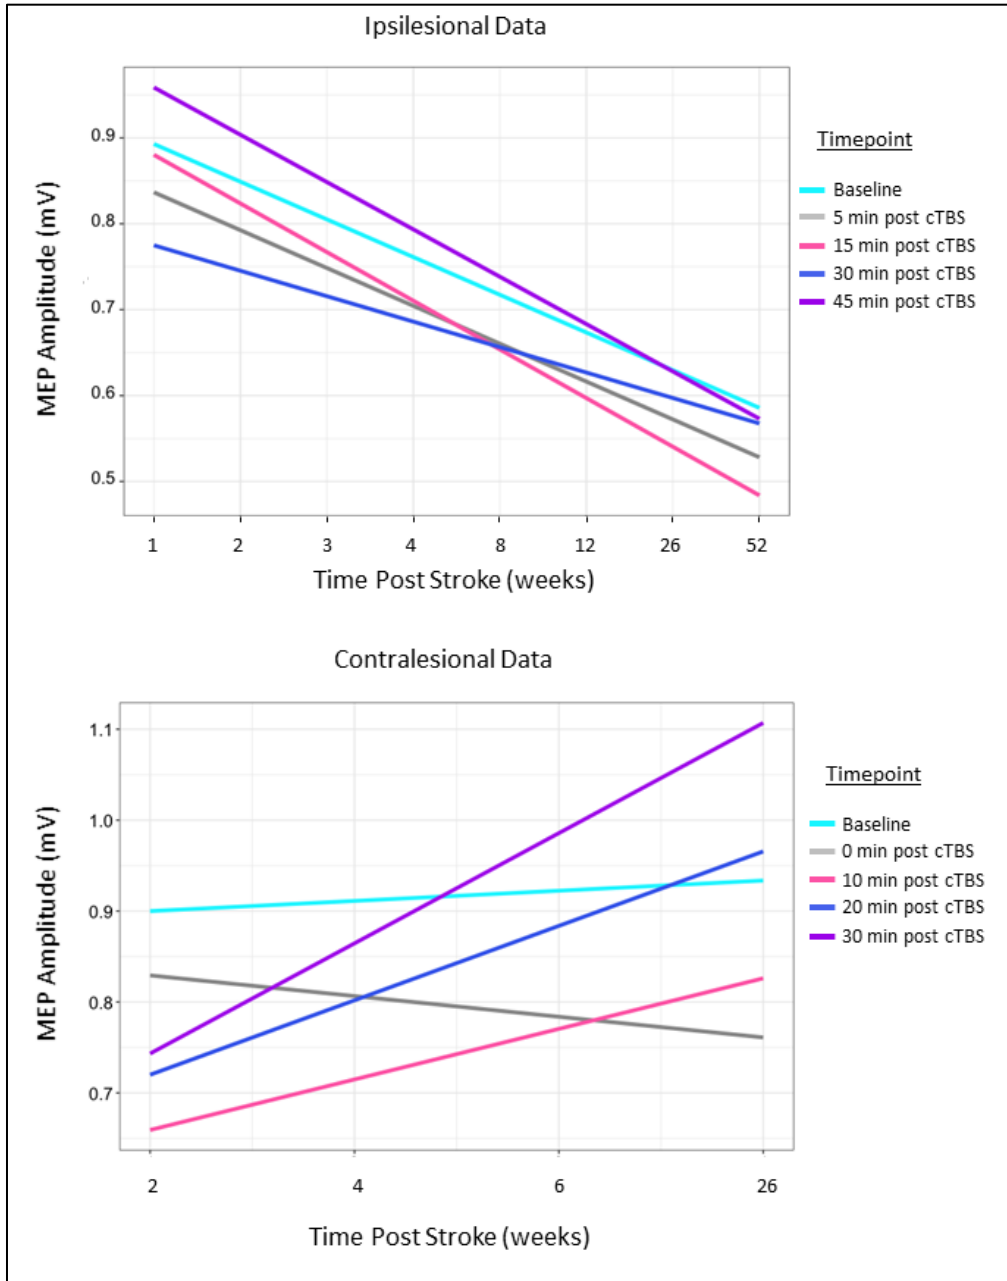

**Figure 2: Linear modelling of continuous theta burst stimulation response for the ipsilesional hemisphere (top) and contralesional hemisphere (bottom).**

cTBS, continuous theta burst stimulation; MEP, motor evoked potential.
